# Supplementary material for: Development and Validation of an Immune Microenvironment Based Prognostic Signature and Signal Pathways in Prostate Cancer
Source: Research Square preprint supplement (doi:10.21203/rs.3.rs-96227/v1), 2020-10-27
Supplement: Supplementary file 1 [file 5aaa86bca9de11d00dc443bf.xlsx]

## Sheet: Sheet1
NAME	ES	NES	NOM p-val	FDR q-val
RPS14_DN.V1_UP	-0.75502	-2.79187	0	0
PTEN_DN.V2_UP	-0.673149	-2.47108	0	0
ESC_V6.5_UP_EARLY.V1_DN	-0.667836	-2.45118	0	0
MEL18_DN.V1_UP	-0.662566	-2.40073	0	0
BMI1_DN.V1_UP	-0.651059	-2.38277	0	0
EGFR_UP.V1_UP	-0.637957	-2.37138	0	0
Analysis of the main oncogenic signatures of LTF gene based on GSEA (C6).
