# Supplementary material for: Development and Validation of an Immune Microenvironment Based Prognostic Signature and Signal Pathways in Prostate Cancer
Source: Research Square preprint supplement (doi:10.21203/rs.3.rs-96227/v1), 2020-10-27
Supplement: Supplementary file 2 [file 6b58c00acea31654b54c4c7b.xlsx]

## Sheet: Sheet1
NAME	ES	NES	NOM p-val	FDR q-val
KEGG_CYTOKINE_CYTOKINE_RECEPTOR_INTERACTION	-0.74802	-2.84943	0	0
KEGG_JAK_STAT_SIGNALING_PATHWAY	-0.747834	-2.71451	0	0
KEGG_CELL_ADHESION_MOLECULES_CAMS	-0.745936	-2.65959	0	0
KEGG_NATURAL_KILLER_CELL_MEDIATED_CYTOTOXICITY	-0.685924	-2.46258	0	0
KEGG_CHEMOKINE_SIGNALING_PATHWAY	-0.651853	-2.44203	0	0
KEGG_LEUKOCYTE_TRANSENDOTHELIAL_MIGRATION	-0.637963	-2.2738	0	0
KEGG_PRIMARY_IMMUNODEFICIENCY	-0.7666	-2.24232	0	0
KEGG_PROSTATE_CANCER	-0.49948	-1.95826	0.0127315	0.00681182
KEGG_PATHWAYS_IN_CANCER	-0.49413	-1.8999	0	0.000512
KEGG_MAPK_SIGNALING_PATHWAY	-0.486678	-1.84906	0	8.5e-06
KEGG_BASAL_CELL_CARCINOMA	-0.544364	-1.76113	0	0.00269511
KEGG_SMALL_CELL_LUNG_CANCER	-0.505676	-1.72502	0	0.00403711
KEGG_WNT_SIGNALING_PATHWAY	-0.420393	-1.51792	0.0043337	0.0323229
KEGG_P53_SIGNALING_PATHWAY	-0.448966	-1.50963	0.0146341	0.0343038
Based on KEGG to analyze the biological pathways of LTF enrichment in tumor tissues.
