# Supplementary material for: Development and Validation of an Immune Microenvironment Based Prognostic Signature and Signal Pathways in Prostate Cancer
Source: Research Square preprint supplement (doi:10.21203/rs.3.rs-96227/v1), 2020-10-27
Supplement: Supplementary file 3 [file 7de64159e17f12918f7ed310.xlsx]

## Sheet: Sheet1
CancerType	Gene	ImmuneScore
BLCA	LTF	0
KIRP	LTF	0
LGG	LTF	0
PRAD	LTF	0
SKCM	LTF	0
BRCA	LTF	1.12055e-21
LUSC	LTF	1.5891e-15
LUAD	LTF	3.36638e-15
LIHC	LTF	6.73083e-13
SARC	LTF	2.89981e-12
STAD	LTF	1.46583e-11
GBM	LTF	6.23364e-10
THYM	LTF	9.42579e-10
HNSC	LTF	5.92951e-09
UVM	LTF	9.39863e-08
PCPG	LTF	1.52336e-06
COAD	LTF	7.08668e-06
ACC	LTF	1.75994e-05
ESCA	LTF	4.05635e-05
CHOL	LTF	4.99638e-05
UCEC	LTF	0.000124636
LAML	LTF	0.00075899
PAAD	LTF	0.000977678
KIRC	LTF	0.00597486
MESO	LTF	0.00884446
CESC	LTF	0.0172604
TGCT	LTF	0.0211998
UCS	LTF	0.0247465
OV	LTF	0.0277196
A correlation test was performed on the LTF expression matrix and microenvironment score of 33 tumors. (P<0.05)
